# Supplementary material for: The α- and β-Subunit Boundary at the Stem of the Mushroom-Like α3β3-Type Oxygenase Component of Rieske Non-Heme Iron Oxygenases Is the Rieske-Type Ferredoxin-Binding Site
Source: PubMed Central journal article supplement (PMC9361823; doi:10.1128/aem.00835-22), 2022-07-13
Supplement: aem.00835-22-s0001.pdf [file aem.00835-22-s0001.pdf]

## Supplementary materials

# The $\alpha$ - and $\beta$ -Subunit Boundary at the Stem of the Mushroom-Like $\alpha_3\beta_3$ -Type Oxygenase Component of Rieske Non-heme Iron Oxygenases is the Rieske-Type Ferredoxin-Binding Site

Pi-Cheng Tsai,<sup>a</sup> Joydeep Chakraborty,<sup>a,b</sup> Chiho Suzuki-Minakuchi,<sup>a,c</sup> Tohru Terada,<sup>c,d</sup> Tatsuro  
Kotake,<sup>a</sup> Jun Matsuzawa,<sup>a</sup> Kazunori Okada,<sup>a</sup> and Hideaki Nojiri<sup>a,c,#</sup>

<sup>a</sup> Agro-Biotechnology Research Center, Graduate School of Agricultural and Life Sciences, The University of Tokyo, 1-1-1 Yayoi, Bunkyo-ku, Tokyo 113-8657, Japan

<sup>b</sup> Department of Microbiology, School of Science, RK University, Kasturbadham, Rajkot - 360020, Gujarat, India

<sup>c</sup> Collaborative Research Institute for Innovative Microbiology, The University of Tokyo, 1-1-1 Yayoi, Bunkyo-ku, Tokyo 113-8657, Japan

<sup>d</sup> Department of Biotechnology, Graduate School of Agricultural and Life Sciences, The University of Tokyo, 1-1-1 Yayoi, Bunkyo-ku, Tokyo, 113-8657, Japan

#Address correspondence to Hideaki NOJIRI, [anojiri@g.ecc.u-tokyo.ac.jp](mailto:anojiri@g.ecc.u-tokyo.ac.jp)

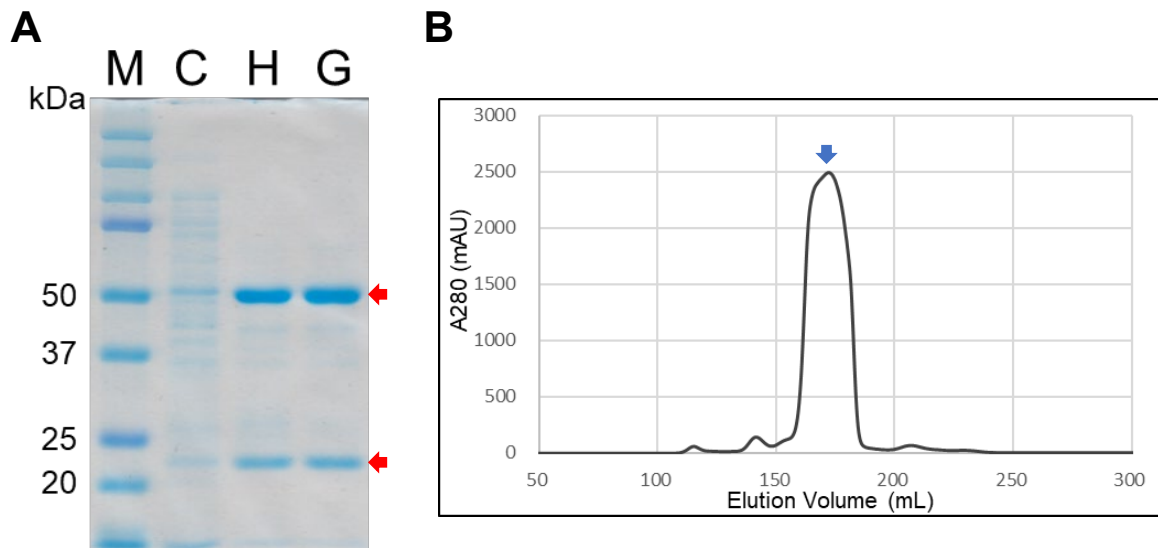

**Figure S1. Elution profile of gel filtration chromatography of WT CDO-O**

(A) 10% Glycine SDS-PAGE of WT CDO-O. Red arrows indicate  $\alpha$ -subunit of CumDO-O

(51 kDa) and  $\beta$ -subunit of CumDO-O (21 kDa). C: crude extract, H: purified by metal-

chelation chromatography, G: purified by gel filtration chromatography, M: Precision Plus

Protein™ Dual Color Standards. (B) Gel chromatography of the affinity purified WT CDO-O.

Black line indicates absorbance at 280 nm (mAU). Blue arrow indicates the peak of CumDO-O.

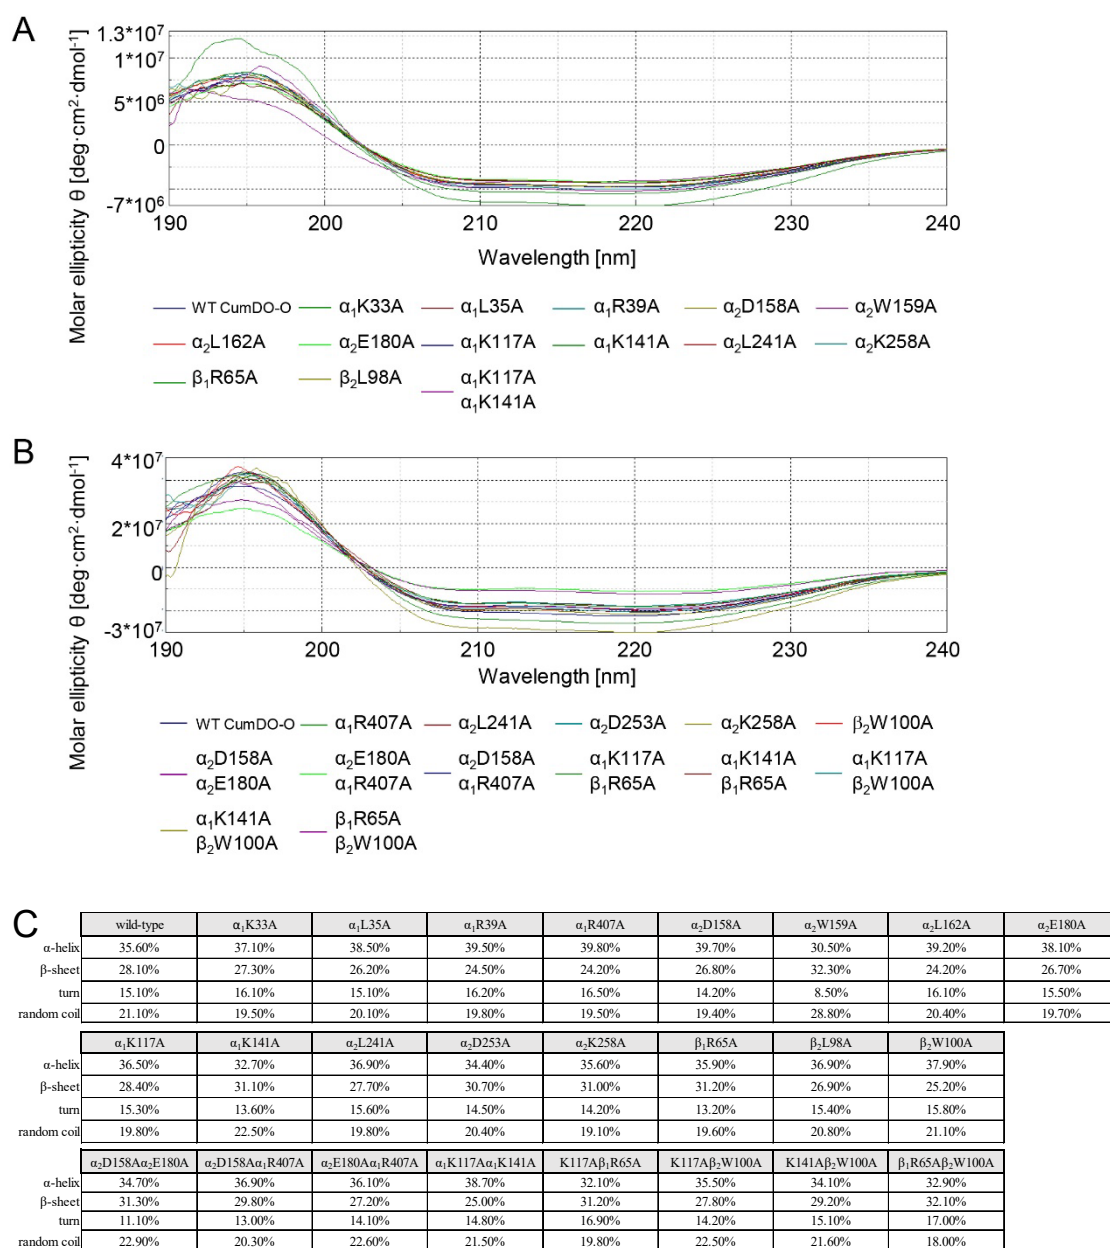

**Figure S2. Circular dichroic (CD) spectral profiles of alanine-substituted CumDO-Os.**

(A) and (B) The CD spectral profiles measured for various samples in different days are shown in different panels. Protein concentrations of all samples were adjusted to 0.3 mg/mL. X-axis is the wavelength and Y-axis is the molar ellipticity  $\theta$ . (C) Ratios of  $\alpha$ -helix,  $\beta$ -sheet, turn and random coil in CumDO-O derivatives are shown.

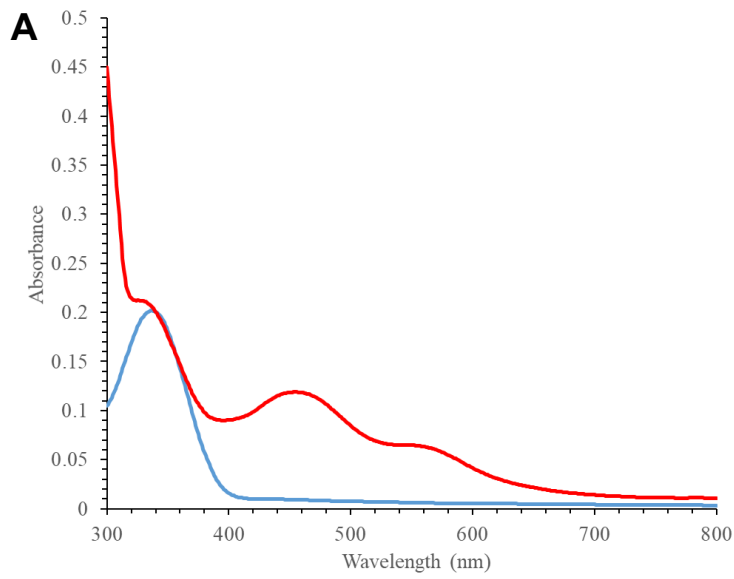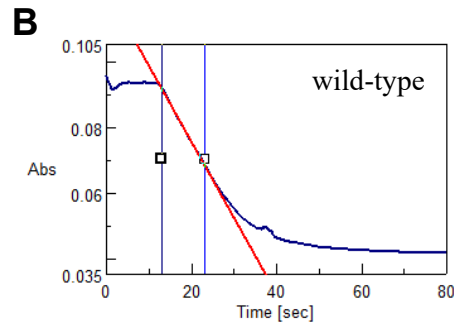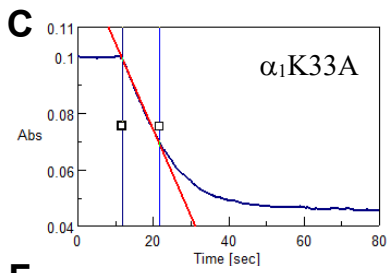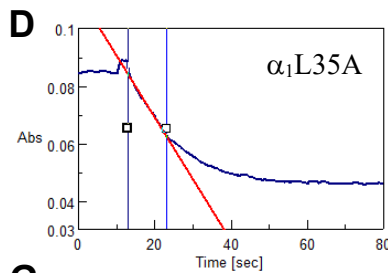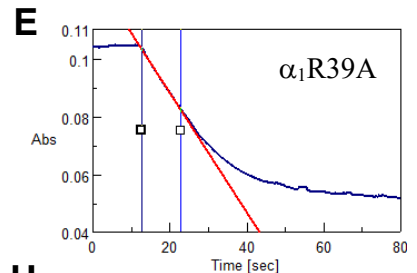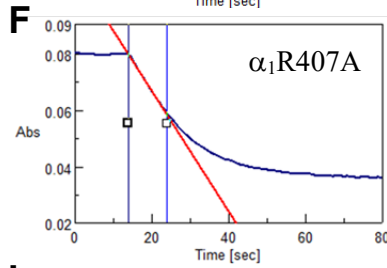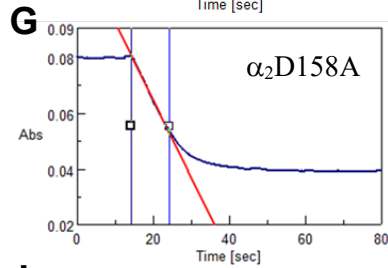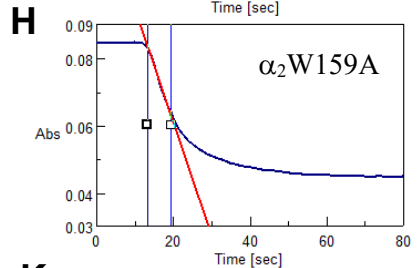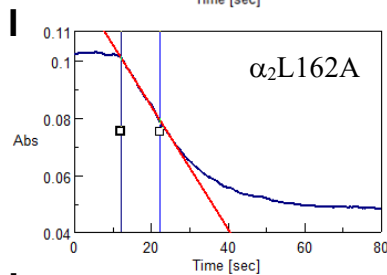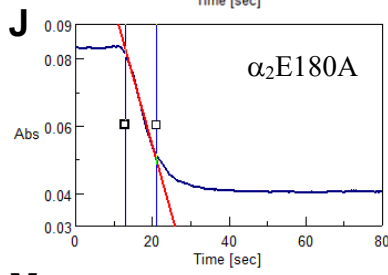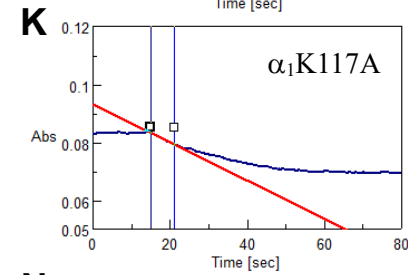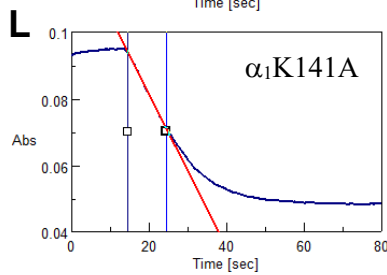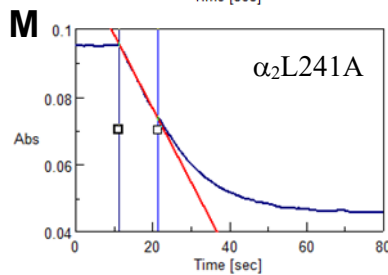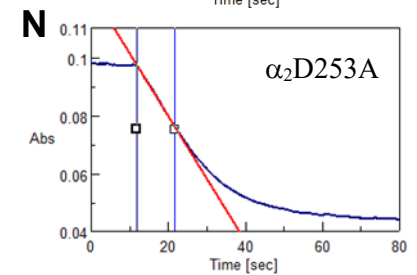

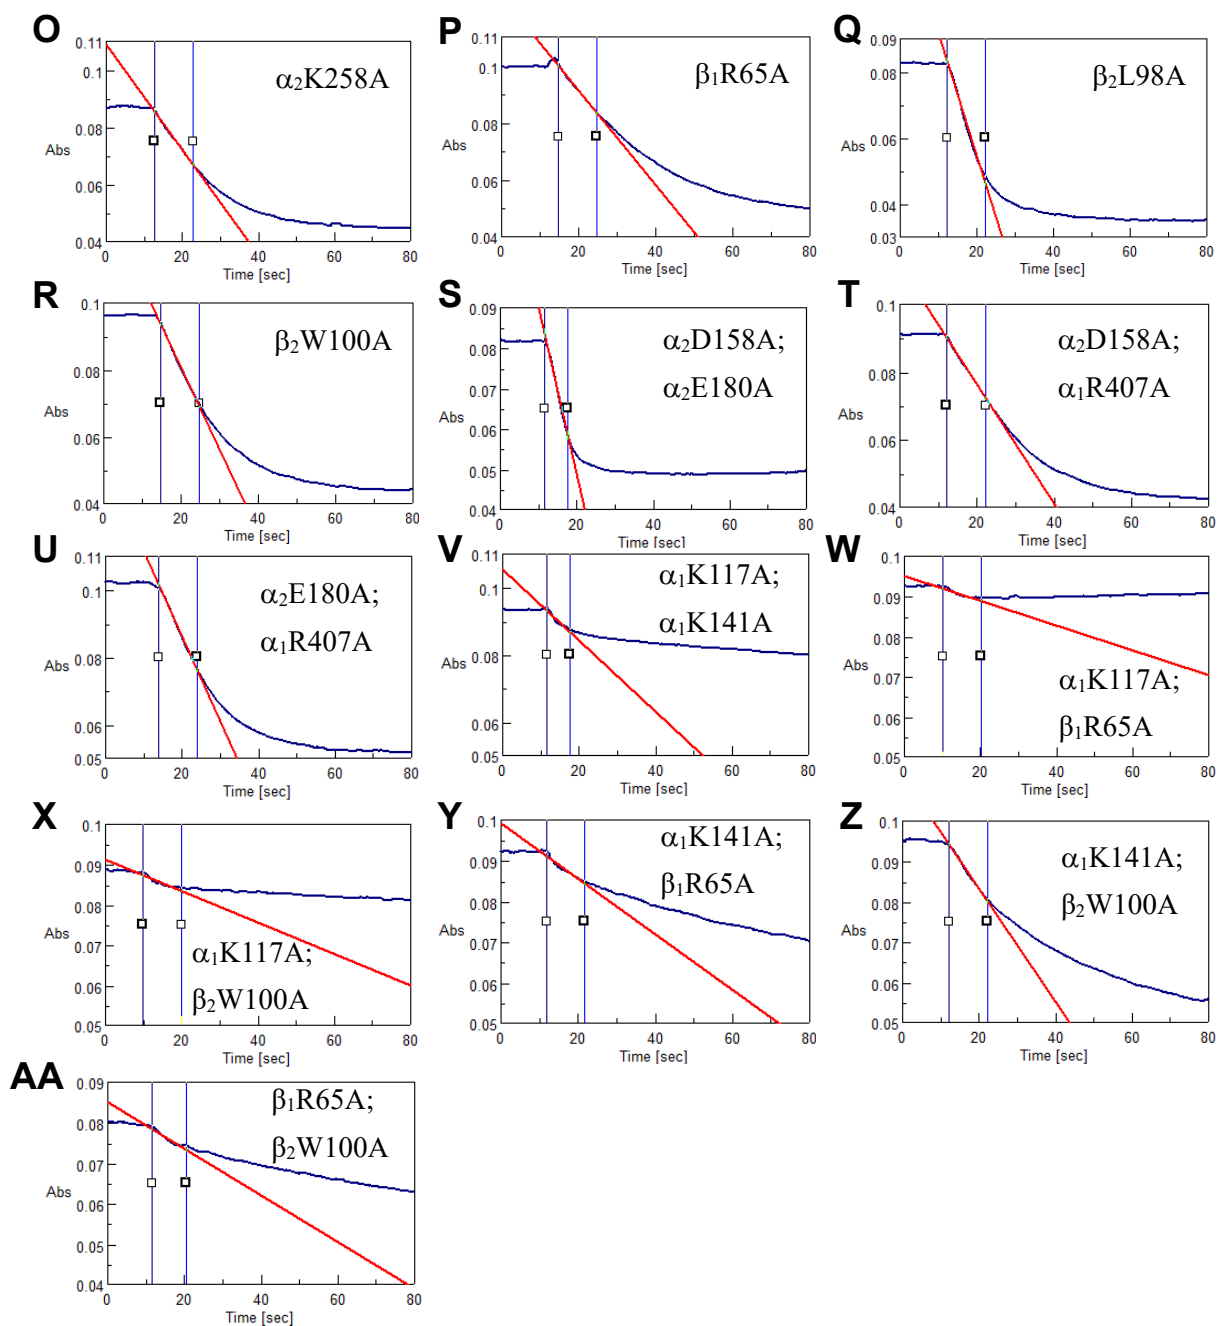

**Figure S3. UV-Vis absorption spectrum and reduction efficiencies of WT CumDO-O and variants**

(A) UV-Vis absorption spectrum of oxidized state (red) and reduced state (blue) WT CDO-Os. Oxidized state CumDO-O was the resting state after purification. To measure the spectrum for reduced state CumDO-O, absorbance spectra of mixture of excess amount of NADH, 0.2  $\mu\text{M}$

CumDO-R, 0.2  $\mu$ M CumDO-F and 10  $\mu$ M CumDO-O was recorded. The oxidized Rieske cluster has peak at 457 nm and peak shoulder at 570 nm. (B-D) The raw data of reduction efficiency of wild-type,  $\alpha_1$ K33A,  $\alpha_1$ L35A,  $\alpha_1$ R39A,  $\alpha_1$ R407A,  $\alpha_2$ D158A,  $\alpha_2$ W159A,  $\alpha_2$ L162A,  $\alpha_2$ E180A,  $\alpha_1$ K117A,  $\alpha_1$ K141A,  $\alpha_2$ L241A,  $\alpha_2$ D253A,  $\alpha_2$ K258A,  $\beta_1$ R65A,  $\beta_2$ L98A,  $\beta_2$ W100A,  $\alpha_2$ D158A; $\alpha_2$ E180A,  $\alpha_2$ D158A; $\alpha_1$ R407A,  $\alpha_2$ E180A; $\alpha_1$ R407A,  $\alpha_1$ K117A; $\alpha_1$ K141A,  $\alpha_1$ K117A; $\beta_1$ R65A,  $\alpha_1$ K117A; $\beta_2$ W100A,  $\alpha_1$ K141A; $\beta_1$ R65A,  $\alpha_1$ K141A; $\beta_2$ W100A, and  $\beta_1$ R65A; $\beta_2$ W100A (B-AA). The red line was fitted with the initial rate of absorbance decrease. The time range of calculation of red line was 10 seconds. We defined the slope of red line as reduction efficiency.

| <b>A</b>                                      | $\alpha$ subunit                                 | ▼ | $\beta$ subunit                             | ▼  |
|-----------------------------------------------|--------------------------------------------------|---|---------------------------------------------|----|
| Cumene dioxygenase <sub>IP01</sub>            | <u>CR</u> HRGMRIERSDFGN <u>AK</u> SFTCTYHGWA     |   | YWMP <del>I</del> RTHTS <del>R</del> NKAMEY | 71 |
| Phthalate dioxygenase <sub>PYR-1</sub>        | <u>CL</u> HRGMQVCRAEMGNASHFRCPYHGWS              |   | YYMPVRITTAAGAGFDSS                          | 88 |
| Phthalate dioxygenase <sub>DBF63</sub>        | <u>CL</u> HRGMQVCRAEMGNASHFRCPYHGWS              |   | YLMPVRVTTALGAGFDTS                          | 81 |
| Phthalate dioxygenase <sub>12B</sub>          | <u>CL</u> HRGMQVCRAEMGNASHFRCPYHGWS              |   | YLMPVRVTTALGAGYSTS                          | 88 |
| Phenanthrene dioxygenase <sub>KP7</sub>       | <u>CR</u> HRGTL <del>L</del> CRTEAGNTSHFRCPYHGWT |   | YVIPVQTTREAHGGSAS                           | 61 |
| Naphthalene dioxygenase <sub>NCIMB12038</sub> | <u>CR</u> HRGMQVCRAEMGNTSHFRCPYHGWT              |   | YVVP <del>I</del> RVTREAEAVTDVV             | 61 |
| Naphthalene dioxygenase <sub>P200</sub>       | <u>CR</u> HRGMQVCRAEMGNASHFRCPYHGWT              |   | YIVPLRV <del>T</del> REAEAVTDVV             | 61 |
| Dibenzofuran dioxygenase <sub>SAO101</sub>    | <u>CR</u> HRGMQVCRAEMGNASHFRCPYHGWT              |   | YIVPLRV <del>T</del> REAEAVTDVV             | 61 |

  

| <b>B</b>                                  | $\alpha$ subunit                                 | ▼ | $\beta$ subunit                                     | ▼   |
|-------------------------------------------|--------------------------------------------------|---|-----------------------------------------------------|-----|
| Cumene dioxygenase <sub>IP01</sub>        | <u>CR</u> HRGMRIERSDFGN <u>AK</u> SFTCTYHGWA     |   | YWMP <del>I</del> RTHTS----- <del>R</del> NKAMEY    | 71  |
| Aniline dioxygenase <sub>YAA</sub>        | <u>C</u> PHRGAKVCRNDSGNS <u>K</u> TFTCPYHGWK     |   | YWIPGSM-----AASPASEATYEF                            | 95  |
| Aniline dioxygenase <sub>7N</sub>         | <u>C</u> SHRGATVCREHQGNAANFTCPYHGWR              |   | YWVPAGAP-----APDPRQYVTFLEF                          | 111 |
| Aniline dioxygenase <sub>ANA-18</sub>     | <u>C</u> SHRGASVCREQGRGNF-EFTCPYHGWR             |   | YWIPAGSP-----APDPRHAVTFLEF                          | 110 |
| Aniline dioxygenase <sub>UCC22</sub>      | <u>C</u> SHRGASVCREHRGNAAGFTCPYHGWR              |   | YWIPAVSP-----APDPRCSVTFLEF                          | 111 |
| Aniline dioxygenase <sub>AD9</sub>        | <u>C</u> SHRGASVCREHRGNAAGFTCPYHGWR              |   | YWIPAVSP-----APDPRCSVTFLEF                          | 111 |
| Anthranilate dioxygenase <sub>ADP1</sub>  | <u>C</u> EHRGATL <del>T</del> RVAKGNQSVFTCPFHAWC |   | YHIPQWIDDHNYVQDPNQGLSYIY                            | 61  |
| Anthranilate dioxygenase <sub>PAO1</sub>  | <u>C</u> QHRGATLVRVKGKGNQSTFTCPFHAWC             |   | FHL <del>P</del> QWSESEQRYTRDPK <del>R</del> ETSLIY | 61  |
| Anthranilate dioxygenase <sub>CA10</sub>  | <u>C</u> QHRGTTL <del>T</del> RVGKGNQSTFTCPFHAWC |   | FHL <del>P</del> QWSEHEHYTRDPK <del>R</del> AMSLIY  | 61  |
| Benzoate dioxygenase <sub>RHA1</sub>      | <u>C</u> SHRGAMLCRRKTDNRTTFTCPFHGWT              |   | FWMPAWADDGELTTDPMTEISLIY                            | 66  |
| Benzoate dioxygenase <sub>ADP1</sub>      | <u>C</u> SHRGAQLCRHKRGNKTTYTCPFHGWT              |   | FWMPAWDDNDQLTENPQTEISLIY                            | 67  |
| Toluate dioxygenase <sub>PAO1</sub>       | <u>C</u> SHRGAMLCRHKSGNRSYTCPFHGWT               |   | FWMP <del>S</del> WDDRDQLTEDPQ <del>R</del> EISLIW  | 60  |
| Halobenzoate dioxygenase <sub>E2CBS</sub> | <u>C</u> SHRGAELCRRKQGNRSTFTCPFHGWT              |   | FWMPCWDDADTLVDDPRK <del>H</del> VSLIY               | 63  |
| Chlorobenzoate dioxygenase <sub>NK8</sub> | <u>CA</u> HKGAMLCRRKHGNKGSFTCPFHGWT              |   | YWMPAWDDDDQITDDHESQISLMY                            | 60  |

**Figure S4. Amino acid sequence alignments of  $\alpha$ - and  $\beta$ -subunits of CumDO Oxy with those of  $\alpha_3\beta_3$ -type Oxys coupled with non-Rieske-type Fds (A) and with Reds (B).**

Only Oxy amino acid residues crucial for binding to Rieske-type Fds are shown. Positions of surface Lys and Arg residues proposed to be crucial for binding between  $\alpha_3\beta_3$ -type Oxys and Rieske-type Fds are indicated by arrow heads. At these positions, conserved and similar amino acid residues are dark- and light-shaded, respectively. The four conserved ligands for the Rieske cluster in  $\alpha$  subunits are underlined. Numbers at right show the positions of terminal amino acid residues. Enzyme names and origins (subscripted) are shown at left.

**Table S1. List of oxygenase components used in alignment analyses.**

| Name of RO [Organism]                                                  | α subunit |               | β subunit |               |
|------------------------------------------------------------------------|-----------|---------------|-----------|---------------|
|                                                                        | Protein   | Accession no. | Protein   | Accession no. |
| <b>Oxygenase components coupled with Rieske-type ferredoxin</b>        |           |               |           |               |
| Cumene dioxygenase [ <i>Pseudomonas fluorescens</i> IP01]              | CumA1     | BAA07074      | CumA2     | BAA07075      |
| Isopropylbenzene dioxygenase [ <i>Pseudomonas</i> sp. JR1]             | IpbA1     | AAB36666      | IpbA2     | AAB36667      |
| Alkylbenzene dioxygenase<br>[ <i>Pseudomonas putida</i> 01G3]          | EbdAa     | CAB99196      | EbdAb     | CAB99197      |
| Isopropylbenzene dioxygenase<br>[ <i>Pseudomonas putida</i> RE204]     | IpbAa     | AAC03436      | IpbAb     | AAC03437      |
| Isopropylbenzene dioxygenase<br>[ <i>Rhodococcus erythropolis</i> BD2] | IpbA1     | AAP74038      | IpbA2     | AAP74039      |
| Alkylbenzene dioxygenase [ <i>Rhodococcus</i> sp. DK17]                | AkbA1a    | AAR90139      | AkbA2a    | AAR90140      |
| Biphenyl dioxygenase [ <i>Dyella ginsengisoli</i> LA-4]                | BphA1     | ABX56038      | BphA2     | ABX56039      |
| Biphenyl dioxygenase<br>[ <i>Pseudomonas furukawaii</i> KF707]         | BphA1     | AAA25743      | BphA2     | AAA25744      |
| Biphenyl dioxygenase [ <i>Achromobacter</i> sp. BP3]                   | BphA1     | ACF20634      | BphA2     | ACF20635      |
| Biphenyl dioxygenase<br>[ <i>Paraburkholderia xenovorans</i> LB400]    | BphA      | AAB63425      | BphE      | AAB63426      |
| Biphenyl dioxygenase [ <i>Pandoraea pnomenus</i> B-356]                | BphA      | AAC44526      | BphE      | AAC44527      |
| Biphenyl dioxygenase<br>[ <i>Comamonas testosteroni</i> TK102]         | BphA1     | BAC01052      | BphA2     | BAC01053      |
| Biphenyl dioxygenase [ <i>Cupriavidus oxalaticus</i> A5]               | BphA1     | CAD61140      | BphA2     | CAD61141      |
| Biphenyl dioxygenase [ <i>Lysobacter</i> sp. OC7]                      | BphA1     | BAH80171      | BphA2     | BAH80172      |
| Biphenyl dioxygenase [ <i>Rhodococcus globerulus</i> P6]               | BphA1     | CAA56346      | BphA2     | CAA56347      |
| Biphenyl dioxygenase [ <i>Janibacter</i> sp. TYM3221]                  | BphAa     | BAK52803      | BphAb     | BAK52804      |
| Biphenyl dioxygenase [ <i>Rhodococcus jostii</i> RHA1]                 | BphA1     | BAA06868      | BphA2     | BAA06869      |
| Toluene dioxygenase [ <i>Pseudomonas putida</i> F1]                    | TodC1     | AAA26005      | TodC2     | AAA26006      |
| Benzene dioxygenase [ <i>Pseudomonas putida</i> ML2]                   | BedC1     | AAA17758      | BedC2     | AAA17759      |
| Benzene dioxygenase [ <i>Rhodococcus opacus</i> B4]                    | BnzA1     | BAD95523      | BnzA2     | BAD95524      |
| Chlorobenzene dioxygenase [ <i>Burkholderia</i> sp. PS12]              | TecA1     | AAC46390      | TecA2     | AAC46391      |
| Chlorobenzene dioxygenase<br>[ <i>Pseudomonas nitroreducens</i> J5-1]  | TcbAa     | ABR26225      | TcbAb     | ABR26226      |
| Chlorobenzene dioxygenase [ <i>Pseudomonas</i> sp. P51]                | TcbAa     | AAC43632      | TcbAb     | AAC43633      |
| Dibenzofuran dioxygenase<br>[ <i>Novosphingobium</i> sp. KA1]          | DbfA1     | WP_011608136  | DbfA2     | WP_011608137  |



|                                                            |        |          |        |          |
|------------------------------------------------------------|--------|----------|--------|----------|
| Carbazole dioxygenase [ <i>Sphingomonas</i> sp. CB3]       | CarAa  | AAC38616 | CarAb  | AAC38617 |
| Tetralin dioxygenase                                       | ThnA1  | AAN26443 | ThnA2  | AAN26444 |
| [ <i>Sphingopyxis macrogoltabida</i> TFA]                  |        |          |        |          |
| Naphthalene dioxygenase                                    | PahA3  | BAA12240 | PahA4  | BAA12241 |
| [ <i>Pseudomonas aeruginosa</i> PaK1]                      |        |          |        |          |
| Naphthalene dioxygenase                                    | NahAc  | AAD02136 | NahAd  | AAD02137 |
| [ <i>Pseudomonas stutzeri</i> AN10]                        |        |          |        |          |
| Naphthalene dioxygenase                                    | NagAc  | AAZ93388 | NagAd  | AAZ93389 |
| [ <i>Polaromonas naphthalenivorans</i> CJ2]                |        |          |        |          |
| Naphthalene dioxygenase [ <i>Ralstonia</i> sp. U2]         | NagAc  | AAD12610 | NagAd  | AAD12611 |
| Naphthalene dioxygenase [ <i>Pseudomonas putida</i> G7]    | NahAc  | AAA25902 | NahAd  | AAA25903 |
| Naphthalene dioxygenase [ <i>Pseudomonas putida</i> ND6]   | NahAc  | AAP44288 | NahAd  | AAP44289 |
| Naphthalene dioxygenase                                    | NahA3  | AAB62707 | NahA4  | AAB62708 |
| [ <i>Pseudomonas putida</i> BS202]                         |        |          |        |          |
| Naphthalene dioxygenase                                    | NahAc  | AAO64274 | NahAd  | AAO64275 |
| [ <i>Pseudomonas putida</i> NCIB 9816-4]                   |        |          |        |          |
| Naphthalene dioxygenase [ <i>Pseudomonas</i> sp. C18]      | -      | 4HJL_A   | -      | 4HJL_B   |
| Nitrobenzene dioxygenase [ <i>Comamonas</i> sp. JS765]     | NbzAc  | AAL76202 | NbzAd  | AAL76203 |
| Nitrotoluene dioxygenase [ <i>Pseudomonas</i> sp. JS42]    | NtdAc  | AAB40383 | NtdAd  | AAB40384 |
| Dinitrotoluene dioxygenase                                 | DntAc  | AAL50021 | DntAd  | AAL50020 |
| [ <i>Burkholderia cepacia</i> R34]                         |        |          |        |          |
| Dinitrotoluene dioxygenase [ <i>Burkholderia</i> sp. RASC] | DntAc  | AAB09766 | DntAd  | AAB09767 |
| Phenanthrene dioxygenase                                   | PhnAc  | BAA76323 | PhnAd  | BAA76324 |
| [ <i>Alcaligenes faecalis</i> AFK2]                        |        |          |        |          |
| PAH dioxygenase [ <i>Pseudomonas putida</i> OUS82]         | PahAc  | BAA20391 | PahAd  | BAA20392 |
| PAH dioxygenase [ <i>Cycloclasticus</i> sp. A5]            | PhnA1  | BAC81541 | PhnA2  | BAC81542 |
| Biphenyl dioxygenase [ <i>Sphingobium yanoikuyae</i> B1]   | BphA1f | ABM91740 | BphA2f | ABM91741 |
| PAH dioxygenase [ <i>Sphingomonas</i> sp. CHY-1]           | PhnA1a | CAG17576 | PhnA1a | CAG17577 |

---

Oxygenase components coupled with non-Rieske ferredoxin

---

|                                                          |       |          |       |          |
|----------------------------------------------------------|-------|----------|-------|----------|
| Phthalate dioxygenase                                    | PhtAa | AAQ91914 | PhtAb | AAQ91915 |
| [ <i>Mycolicibacterium vanbaalenii</i> PYR-1]            |       |          |       |          |
| Phthalate dioxygenase [ <i>Terrabacter</i> sp. DBF63]    | PhtA1 | BAC54156 | PhtA2 | BAC54157 |
| Phthalate dioxygenase [ <i>Arthrobacter keyseri</i> 12B] | PhtAa | AAK16534 | PhtAb | AAK16535 |
| Phenanthrene dioxygenase [ <i>Nocardioides</i> sp. KP7]  | PhdA  | BAA94708 | PhdB  | BAA94709 |
| Naphthalene dioxygenase                                  | NarAa | AAD28100 | NarAb | AAD28101 |
| [ <i>Rhodococcus</i> sp. NCIMB 12038]                    |       |          |       |          |

|                                                                     |        |          |        |          |
|---------------------------------------------------------------------|--------|----------|--------|----------|
| Naphthalene dioxygenase [ <i>Rhodococcus</i> sp. P200]              | NarAa  | AAR05114 | NarAb  | AAR05115 |
| Dibenzofuran dioxygenase<br>[ <i>Rhodococcus opacus</i> SAO 101]    | DodA   | BAD02377 | DodB   | BAD02378 |
| <b>ROs without ferredoxin component</b>                             |        |          |        |          |
| Aniline dioxygenase [ <i>Acinetobacter</i> sp. YAA]                 | AtdA3  | BAA13012 | AtdA3  | BAA13013 |
| Aniline dioxygenase [ <i>Delftia acidovorans</i> 7N]                | Orf7NC | BAD61049 | Orf7ND | BAD61050 |
| Aniline dioxygenase [ <i>Frateuria</i> sp. ANA-18]                  | TdnA1  | BAC82526 | TdnA2  | BAC82527 |
| Aniline dioxygenase [ <i>Pseudomonas putida</i> UCC22]              | TdnA1  | BAA12807 | TdnA1  | BAA12808 |
| Aniline dioxygenase [ <i>Delftia tsuruhatensis</i> AD9]             | TadA1  | AAX47241 | TadA1  | AAX47242 |
| Anthranilate dioxygenase [ <i>Acinetobacter baylyi</i> ADP1]        | AntA   | AAC34813 | AntB   | AAC34814 |
| Anthranilate dioxygenase<br>[ <i>Pseudomonas aeruginosa</i> PAO1]   | AntA   | AAG05900 | AntB   | AAG05901 |
| Anthranilate dioxygenase<br>[ <i>Pseudomonas resinovorans</i> CA10] | AntA   | BAB32747 | AntB   | BAB32746 |
| Benzoate dioxygenase [ <i>Rhodococcus jostii</i> RHA1]              | BenA   | BAB70698 | BenB   | BAB70699 |
| Benzoate dioxygenase [ <i>Acinetobacter baylyi</i> ADP1]            | BenA   | AAC46436 | BenB   | AAC46437 |
| Toluate dioxygenase [ <i>Pseudomonas aeruginosa</i> PAO1]           | XylX   | AAG05906 | XylY   | AAG05905 |
| Halobenzoate dioxygenase<br>[ <i>Burkholderia cepacia</i> 2CBS]     | CbdA   | CAA55681 | CbdB   | CAA55682 |
| Chlorobenzoate dioxygenase [ <i>Burkholderia</i> sp. NK8]           | CbeA   | BAB21463 | CbeB   | BAB21464 |
